# Supplementary material
Source: HighWire-hosted journal article supplement (https://cmaj.ca/highwire/filestream/151098/field_highwire_adjunct_files/0/240393-image-1-at.pdf)
Supplement: 240393-image-1-at.pdf [file 240393-image-1-at.pdf]

## Appendix 1

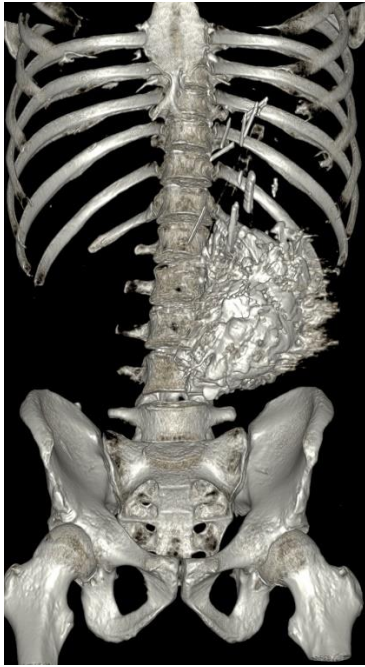

**Supplemental Figure 1:** Three-dimensional computed tomography showing the presence of hyperdense material at the gastric endoluminal site.

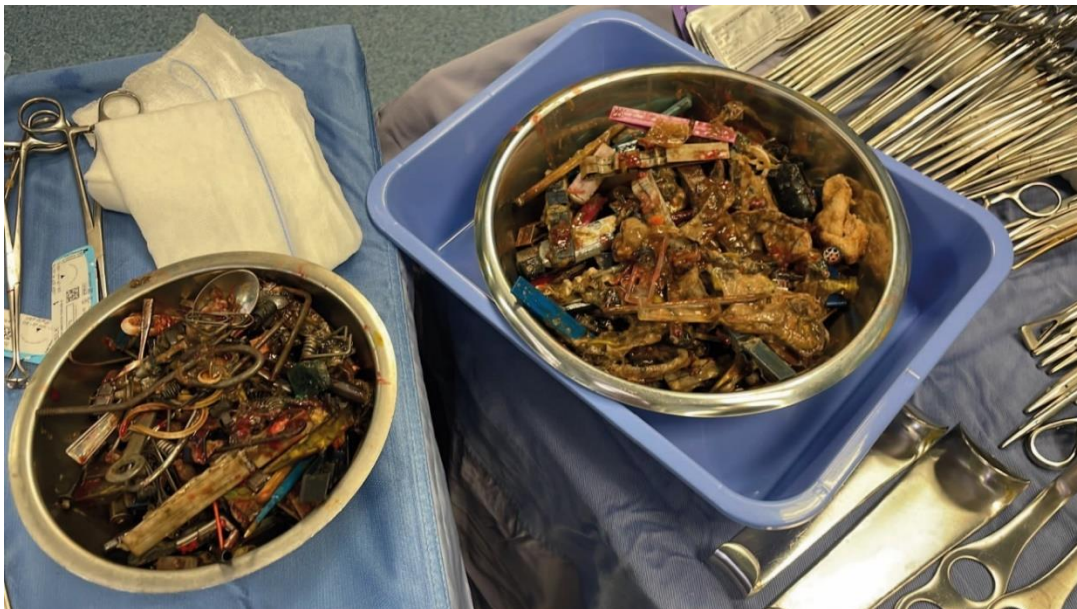

**Supplemental Figure 2:** Many plastic, wooden and metal objects were surgically removed from the patient's stomach.
